# Supplementary material
Source: publisher site journal article supplement (https://www.degruyterbrill.com/publication/journal_key/ZFK/downloadAsset/ZFK_Leseprobe.pdf)
Supplement: Supplementary file 1 [file ZFK_Leseprobe.pdf]

# Forensik

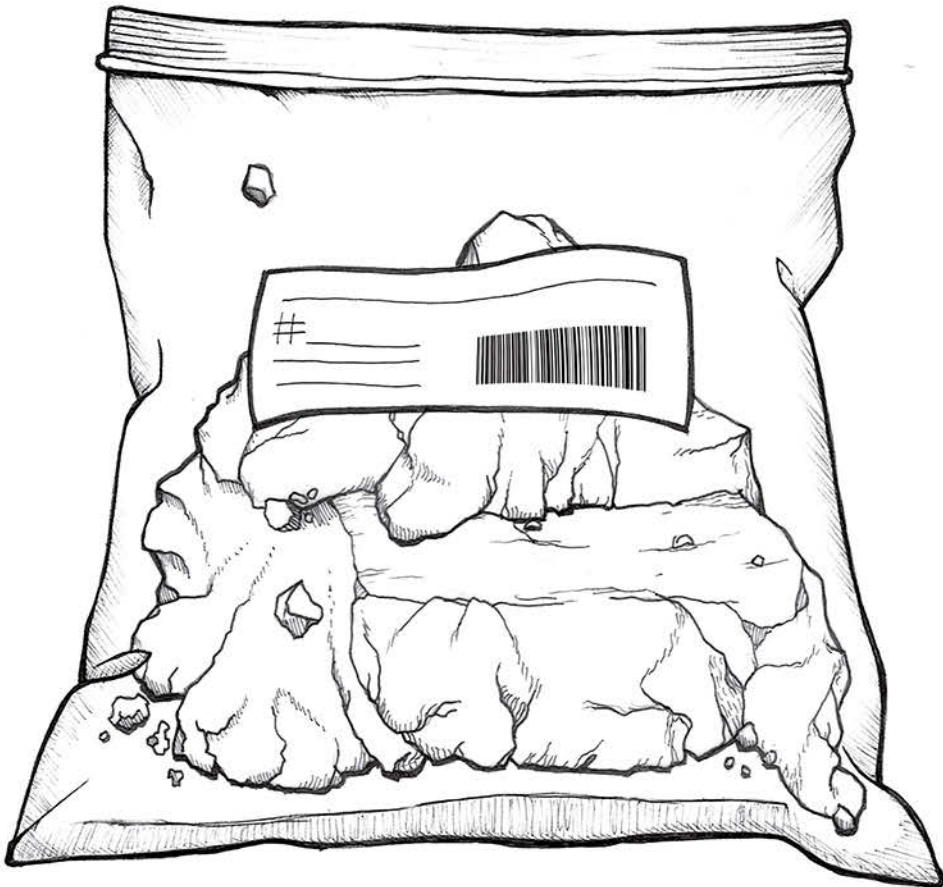

## Aus:

Zuzanna Dziuban, Kirsten Mahlke, Gudrun Rath (Hg.)

### Forensik

Zeitschrift für Kulturwissenschaften, Heft 1/2019

Mai 2019, 128 S., kart., Klebebindung, 20 Farbabbildungen

14,99 € (DE), 978-3-8376-4462-3

E-Book:

PDF: 14,99 € (DE), ISBN 978-3-8394-4462-7

Die Zeitschrift für Kulturwissenschaften dient als kritisches Medium für Diskussionen über »Kultur«, die Kulturwissenschaften und deren methodische Verfahren. Ausgehend vom internationalen Stand der Forschung sollen kulturelle Phänomene gleichermaßen empirisch konzis wie theoretisch avanciert betrachtet werden. Auch jüngste Wechselwirkungen von Human- und Naturwissenschaften werden reflektiert.

Forensische Methoden tragen in ihrer Gestaltung und Übersetzung materieller Spuren zu einem neuen Verständnis der Vergangenheit bei. Sie formen die Beziehungen zwischen Lebenden und Toten und rufen neue Dynamiken von Erinnerung und Trauer hervor. Diese Ausgabe der ZfK widmet sich der Rolle der Forensik in der Alltagskultur sowie in Kontexten von (Massen-)Gewalt der weiter zurückliegenden und unmittelbaren Vergangenheit – von kolonialen wissenschaftlichen Praktiken über die Aufarbeitung der NS-Zeit und des Spanischen Bürgerkriegs bis zum zeitgenössischen Mexiko. Im Debattenteil wird, ausgehend von einem Text Rosi Braidottis, die Möglichkeit einer »nomadischen europäischen Bürgerschaft« diskutiert.

**Zuzanna Dziuban** (PhD) ist Kulturwissenschaftlerin an der Universität von Amsterdam und der Freien Universität Berlin. Ihre Forschungsschwerpunkte sind Gedächtnisstudien, Totenstudien und das Nachleben des Holocaust.

**Kirsten Mahlke** lehrt romanistische Literaturwissenschaft an der Universität Konstanz. Ihre Forschungsfelder sind Erzählformen des Verschwindens in der argentinischen Postdiktatur, Literatur der Fantastik, koloniale Verflechtungsgeschichten sowie Science and Fiction.

**Gudrun Rath** (Dr. phil.) ist Kulturwissenschaftlerin an der Kunstuniversität Linz. Ihre Forschungsschwerpunkte liegen im Bereich Übersetzungs- und Erzähltheorien, Kolonial- und Verflechtungsgeschichte mit dem Schwerpunkt auf Lateinamerika und der Karibik sowie Wissenschaftsgeschichte.

Weiteren Informationen und Bestellung unter:  
[www.transcript-verlag.de/978-3-8376-4462-3](http://www.transcript-verlag.de/978-3-8376-4462-3)

© 2019 transcript Verlag, Bielefeld

# Inhaltsverzeichnis

|         |     |                                                                                                                                      |
|---------|-----|--------------------------------------------------------------------------------------------------------------------------------------|
| THEMA   | 9   | Forensik. Wem gehören die Toten?<br>Zuzanna Dziuban   Kirsten Mahlke   Gudrun Rath                                                   |
|         | 15  | Die ›Lehrmittelsammlung‹ von Dr. Rudolf Pöch an der<br>Universität Wien. Anthropologie, Forensik und Provenienz<br>Sophie Schasiepen |
|         | 29  | Das ›Tal der Gefallenen‹ und die Exhumierung des<br>Diktators. Der Streit um Francos Leichnam<br>Ulrike Capdepón                     |
|         | 43  | Forensik an den Grenzen neu denken.<br>Europäische Gemeinschaft der Toten<br>Zuzanna Dziuban                                         |
|         | 55  | Nicht-Orte der Erinnerung, forensische Denkmäler und<br>die Umweltgeschichte des Holocaust<br>Roma Sendyka                           |
|         | 69  | Neue forensische Landschaften.<br>Verschwundene, Suchmanöver und<br>die Arbeit der Bilder in Mexiko<br>Anne Huffs Schmid             |
| ADAPTER | 87  | <i>Forensic Landscapes</i><br>Filmstills aus <i>Desafiando la Tierra / Defying the Earth</i><br>(2018) von Anne Huffs Schmid         |
| DEBATTE | 101 | Ein nomadisches Europa? Zur Einleitung<br>Zuzanna Dziuban   Kirsten Mahlke   Gudrun Rath                                             |
|         | 102 | Nomadische europäische Bürgerschaft<br>Rosi Braidotti                                                                                |
|         | 107 | Repliken: Manuela Boatcă   Daniel Thym   Estela Schindel                                                                             |
|         | 120 | Autor_innen                                                                                                                          |







## Forensik. Wem gehören die Toten?

**Zuzanna Dziuban, Kirsten Mahlke, Gudrun Rath**

Die Toten sind zurückgekehrt. Sie widerlegen damit Philippe Ariès' Diagnose aus den 1970er-Jahren, dass der Tod in der westlichen Welt unsichtbar gemacht oder sogar »verboten« worden sei (Ariès 1982). Nicht zum ersten Mal tauchen sie in ihrer Rolle auf, größere soziale Veränderungen in Gang zu setzen oder zu spiegeln. Sie erscheinen nun, mit frischer Kraft ausgestattet, um Vorstellungen und (Erinnerungs-)Politiken neu zu strukturieren und soziale Welten hervorzubringen. Diese Ausgabe der *Zeitschrift für Kulturwissenschaften* gewinnt ihren Gegenstand aus der Beobachtung, dass die Bedeutung des Todes und der Toten für heutige Gesellschaften und ihre politischen und kulturellen Belange in den vergangenen Jahrzehnten eine deutliche Veränderung erfahren hat. Welche neuen Diskurse, sozialen Praktiken und Symbolisierungen dadurch generiert und aufgeworfen werden, möchten wir in diesem Heft in vielfältigen Fallstudien untersuchen.

Die Hinwendung zur Forensik zählt zu den wichtigsten Faktoren dieser Entwicklung. Besonders in Kontexten politischer Gewalt treten forensische Untersuchungsmethoden zuvorderst in Erscheinung: als Instrumente, um Beweise für Kriegsverbrechen, Genozide und Menschenrechtsverletzungen zu bergen, zu adressieren, zu sammeln, zu bewahren und zu präsentieren. Diese Privilegierung von physischen Beweisen in ihrer Fähigkeit, »Wahrheit« zu bergen, ging mit einer Begründung von Wahrheitsansprüchen einher. Doch bei forensischen Untersuchungen geht es nie ausschließlich um Wahrheitsfindung. Die wachsende Bedeutung forensischer Expertise und ihrer wissenschaftlichen Methoden trägt zur Gestaltung und Übersetzung materieller Spuren der Gewalt bei. Forensik bedingt auch ein neues Verständnis des Todes, formt und transformiert die Beziehungen zwischen den Toten und den Lebenden und ruft neue Dynamiken von Erinnerung und Trauer hervor. Ihre Rolle bei der Rahmung von Gewalt und Tod eröffnet deshalb ein komplexes Terrain, das durch das Zusammenspiel von wissenschaftlichen Protokollen, politischen Interessen und ethischen Standards in Bezug auf materielle Überreste des Massentodes geprägt ist und eine Vielzahl von Praktiken und Gegenpraktiken, Diskursen und Gegen-Diskursen, Bildern und Gegenbildern der Vergangenheit hervorbringt.

Politische Gewalt mit einer sehr hohen Zahl an Todesopfern ist natürlich keineswegs ein neues Phänomen, doch hat sich die Art und Weise, wie materielle Hinterlassenschaften

verwaltet, untersucht, gerahmt, dargestellt und erfahren wurden, zunehmend verändert. Die Arbeit, mit der das Team des *Equipo Argentino de Antropología Forense* (EAAF) nach der letzten Diktatur in Argentinien Mitte der 1980er-Jahre Forensik als nicht-staatliche Praxis etablierte und damit weitere gesellschaftliche Prozesse in Gang setzte, gilt hier als Meilenstein (Rosenblatt 2015). Seitdem werden weltweit Massengräber der jüngeren oder fernerer Vergangenheit geöffnet, untersucht und exhumiert: Die Gräber des Genozids in Ruanda, der Balkankriege, des Spanischen Bürgerkriegs, des Ersten und Zweiten Weltkriegs. Diese in der südlichen Hemisphäre initiierte Veränderung hat auch westliche Praktiken im Umgang mit den Toten verändert. Die Suche nach Massengräbern, die Anwendung von archäologischen und forensischen Praktiken mit Hilfe hoch entwickelter Techniken Beweise zu sammeln und analysieren – all das hat eine kulturelle, politische und wissenschaftliche Verschiebung der Aufmerksamkeit hin zu Gegenständen und Körpern bewirkt, die es ermöglicht, Orte politischer Gewalt und die juristische Aufarbeitung der Verbrechen neu zu rahmen. Tote Körper stehen im Zentrum dieses Prozesses: Sie werden zum einen als Beweisgegenstände für kriminologische Ermittlungen oder zur Identifikation und Rückführung zu ihren Angehörigen gesichert; zum anderen werden sie zu Subjekten verschiedenster ethischer, religiöser und politischer Belange. Nach ihnen wird gesucht, sie werden ausgegraben und wieder begraben, während ihre materielle Präsenz (neue) Reaktionen auf politischen Massentötungen hervorruft und damit neue Praktiken, Diskurse und Imaginarien.

Parallel dazu ist die physische Gegenwart von menschlichen Überresten, die in westlichen Museen und Sammlungen ausgestellt und gesammelt werden, seit den Anfängen der Provenienz- und Restitutionsdebatten der 1980er und 1990er-Jahre (USA, Australien und Neuseeland) und seit Beginn des 21. Jahrhunderts in Europa, zentral für die Debatten um die europäische Kolonialgeschichte, ihre gewaltvollen Hinterlassenschaften und Konflikte mit historischen und zeitgenössischen indigenen Gesellschaften. Auch in diesem Kontext wurden die forensischen Untersuchungspraktiken und Wahrheitsregime immer wichtiger, wenn auch weniger offensichtlich: Die Notwendigkeit, die Herkunft jener menschlichen Überreste zu untersuchen, die während der Kolonialzeit angeeignet worden sind, sowie ihre Verbindungen zu heutigen Gemeinschaften machte die kolonialen Verflechtungen von Anthropologie und Archäologie, den traditionellen »Disziplinen des Todes« (Raasool 2015), evident. Diese Entwicklung ermöglichte dadurch aber auch die »postkoloniale Provenienzforschung« (Förster 2018), die darauf abzielt, die (kollektive) Identität der Toten und ihrer Körper als Beweise für koloniale Grausamkeiten in forensischer Praxis festzustellen. Ab den 1980er-Jahren wurden auch die menschlichen Überreste von Sinti und Roma, Juden und Jüdinnen und politischen Gefangenen, die während des Nationalsozialismus von anatomischen Instituten in Deutschland und Österreich gesammelt wurden, zum Gegenstand von Aktivismus, kritischer Provenienzforschung, Repatriierung und Bestattung.

Die Bedeutung der materiellen Präsenz der Toten wurde auch im Kontext des europäischen Grenzregimes bestätigt: die Zahl der Toten an den europäischen Außengrenzen, die Kontroversen um die Frage, wie man mit den Körpern umgehen soll, die an den europäischen Stränden angespült werden, der Mangel an Engagement, was ihre Bergung und Identifikation betrifft, rückte die Toten ins Zentrum der Frage nach der kulturellen und



politischen Identität Europas bzw. der Europäischen Union, seiner internen Beziehungen und den Haltungen gegenüber seinen ›Anderen‹.

Wir versammeln in diesem Heft Beiträge, die ein großes Spektrum von Fällen aus verschiedenen Regionen betrachten, in denen Forensik eine entscheidende Rolle bei der Neubewertung politischer Gewalt spielt. Thematisch reichen die Beiträge von indigenen menschlichen Überresten in österreichischen anthropologischen Sammlungen über die Suche nach Leichen in Mexiko und Spanien, die Auswirkungen der materiellen Gegenwart namenloser Gräber im heutigen Polen bis zur Abwesenheit forensischer Untersuchungen an den europäischen Außengrenzen. Unsere Absicht ist jedoch nicht nur eine Zusammenschau dieser jeweils historisch spezifischen forensischen Praktiken, Verfahren, Diskurse und Landschaften und ihrer performativen und emotionalen Auswirkungen sowie weiteren Kontexte und Verzweigungen. Das Heft lotet das Potential des Begriffs ›Forensik‹ als politisches, kulturelles, theoretisches und ästhetisches Konzept aus, indem es sich kritisch mit einem Verständnis der Forensik als staatlich verordneter und gesetzlich verpflichtender Anwendung von Technologie und wissenschaftlichen Kenntnissen auseinandersetzt, die sich als unparteiisch und objektiv ausgibt. Wir erweitern den begrifflichen Raum in breitere soziale/kulturelle/politische und theoretische Gebiete hinein und fragen damit nach den semantischen Verschiebungen der Forensik – von wissenschaftlich/rechtlichen hin zu kulturellen Bedeutungen und Dimensionen.

In Sophie Schasiapens Text, der den komplexen Politiken um die Sammlung und Rückführung menschlicher Überreste nach Südafrika, Neuguinea und Australien gewidmet ist, von denen einige bis heute in wissenschaftlichen Sammlungen der Universität Wien lagern, ist diese Verschiebung als ein neues Verständnis des Begriffs von Forensik fassbar, das eine engagierte Praxis postkolonialer Wissensproduktion aufzeigt. Unrechtskontexte, in denen die Reste beschafft wurden, werden sichtbar gemacht, indem das (wissenschaftliche) Plündern von Begräbnisstätten der einheimischen Bevölkerung, dessen Verwicklung in die Kolonial- und Wissenschaftsgeschichte und die Produktion rassialisierter Subjekte dargestellt werden.

Auch Ulrike Capdepón behandelt in ihrem Artikel die enge Verflechtung von Forensik und Politik, in diesem Fall ausgehend vom Konzept der »Politik toter Körper«. Capdepón zeichnet die Auseinandersetzungen und Praktiken rund um die sterblichen Überreste des spanischen Diktators Francisco Franco und seiner politischen Opponent\_innen nach, die während des Spanischen Bürgerkrieges (1936-1939) getötet wurden, und zeigt so die entscheidende Rolle forensischer Prozesse bei der Wahrheitsfindung und der Suche nach Gerechtigkeit, aber auch bei den Dynamiken von Erinnerung und Trauer in Post-Konflikt-Gesellschaften auf. Der Fokus Capdepóns liegt auf den Kontroversen rund um das *Tal der Gefallenen*, jenem Ort, an dem Franco beigesetzt wurde, aber auch republikanische Tote, die dort ohne das Wissen oder gegen den Willen ihrer Verwandten begraben wurden. Ihre Analyse zeigt, wie die materielle Präsenz der Toten, die durch forensische Praktiken sichtbar und (neu) gerahmt wird, Konflikte ebenso wie politische Mobilisierung anstacheln und die Veränderung sozialer, kultureller und symbolischer Landschaften bewirken kann.

In ihrem Artikel fragt Zuzanna Dziuban nach der Rolle der Forensik als wesentlichem Element von Staatsbürokratie sowie Überwachungs- und Kontrolltechnologie

bei der Produktion der europäischen Grenz-Toten. Dziuban untersucht dabei, wie die professionelle Suche nach Körpern, deren Exhumierung, Identifikation und erneutes Begräbnis in Kontexten politischer Gewalt Gemeinschaften von Toten hervorzubringen vermögen, die auf der inhärenten Dichotomie von Inklusion/Exklusion basieren und nekropolitische Regime befördern, die manche Tote politisch unsichtbar und somit der Trauer unwürdig machen. Es ist daher nicht nur das Versagen staatlicher Organe und der EU bei der Bergung der Opfer ihrer eigenen Grenzregimes und die politischen und ethischen Implikationen dieses Versagens, das der Artikel hinterfragt. Mit einer Kritik der eigentlichen forensischen Untersuchungen, auch jenen, die im Namen der Menschenrechte als verspätete und kompensatorische Antwort auf politisch verursachten Tod vorgenommen werden, appelliert der Beitrag an eine neue ›forensische Sensibilität‹. Diese stellt sich gegen die gewaltvollen Realitäten und kann auf Versagen und Verletzungen reagieren, die hier und heute geschehen und die darauf ausgerichtet sind, die Toten daran zu hindern in Erscheinung zu treten.

Etwas anders wird der Begriff ›forensische Sensibilität‹ von Roma Sendyka gefasst. Sendyka untersucht die Implikationen der physischen Gegenwart unmarkierter Gräber aus der Zeit des Holocaust im heutigen Polen aus post-anthropozentrischer Perspektive. Sie bewegt sich jenseits der Trennlinie von Natur und Kultur zu einem Konzept des ›forensischen Monuments‹ – ein Ort, der nicht durch menschliches Handeln, sondern durch verschiedene nicht-menschliche Akteure (zum Beispiel Vegetation oder geophysikalische Anomalien) markiert ist. Auch wenn Orte von Genoziden verlassen sind und nicht erinnert werden, sind sie stets durch die Präsenz menschlicher Überreste geprägt, die nicht durch Begräbnisriten eingeeht wurden und haben als solche weiterhin affektive Auswirkungen. Sendyka argumentiert, dass die unaufdringlich irritierende Präsenz solcher Stätten auf entscheidende Weise zu einer ›forensischen Sensibilität‹ unter Wissenschaftler\_innen weiterer Disziplinen wie der Kulturanthropologie, den Kulturwissenschaften und bei Vertreter\_innen der *Memory Studies* aufruft und so die Aufgabe ihrer Entzifferung nicht nur forensischen Wissenschaftler\_innen überantwortet werden kann.

Anne Huffs Schmid rahmt Forensik als situierte und politisch aufgeladene Präsentationspraxis, die Bilder und Erzählungen hervorbringt. Forensik wird als Methode betrachtet, die verdunkelte Macht-Beziehungen sichtbar macht. Diese müssen nicht zwangsläufig von staatlichen Akteuren bestimmt werden, sondern auch von politischen Aktivist\_innen und Angehörigen der Toten, die den forensischen Blick umkehren. Die performative Kraft forensischer Praktiken (die Suche nach, die Ausgrabung und Identifikation von Leichen), Diskurse, Bilder und Landschaften bringt die materiellen Hinterlassenschaften der Gewalt zum Vorschein. Forensik ermöglicht damit, alternative Erzählungen von Ereignissen und Wahrheitsansprüchen in Umlauf zu bringen, die jenen widersprechen können, die von den Herrschenden hervorgebracht wurden, die traditionell das Sagen in forensischen Angelegenheiten haben. Aus diesem Grund greift Huffs Schmid auf Eyal Weizmans Begriff der *counterforensics* (Gegen-Forensik) bei der Analyse ihrer Fallstudie zurück. Sie nimmt dabei die Suche nach den Leichen ›verschwundener‹ Verwandter in Mexiko in den Blick, wo die Vernachlässigung durch den Staat besonders eklatant ist. Die visuelle Dokumentation von Huffs Schmidts filmischer Arbeit in Mexiko wird im Adapter dargestellt.

Wie die Artikel dieses Heftes zeigen, tragen forensische Methoden dazu bei, eine neue Art des Sehens, Fühlens, Erzählens und Darstellens herauszubilden. Es ist deshalb nicht genug, ihre Methoden kritisch in den Blick zu nehmen: Forensik kann zur Gegenstrategie für all jene werden, die mit der Untersuchung der Hinterlassenschaften politischer Gewalt in ihren materiellen und Umweltbedingungen zu tun haben.

## Literatur

- ARIÈS, Philippe (1982): *Geschichte des Todes*, übers. v. Hans-Horst Henschen und Una Pfau, München: dtv.
- FÖRSTER, Larissa et al. (Hg.) (2018): *Provenienzforschung zu ethnografischen Sammlungen der Kolonialzeit*, Berlin: Humboldt-Universität.
- RASSOOL, Ciraj (2015): »Human Remains. Disciplines of the Dead and the South African Memorial Complex«. In: *The Politics of Heritage in Africa. Economies, Histories, Infrastructures*, hg. v. D.R. Petersen et al., Cambridge: Cambridge University Press, 133-56.
- ROSENBLATT, Adam (2015): *Digging for the Disappeared. Forensic Science after Atrocity*, Stanford: Stanford University Press.
- WEIZMAN, Eyal (2017): *Forensic Architecture. Violence at the Threshold of Detectability*, New York: Zone Books.



# Die ›Lehrmittelsammlung‹ von Dr. Rudolf Pöch an der Universität Wien. Anthropologie, Forensik und Provenienz

**Sophie Schasiepen**

Als Dr. Rudolf Pöch (1870-1921) im Jahr 1910 als Privatdozent an der Universität Wien zu unterrichten begann, zog mit ihm erstmalig eine anthropologische ›Lehrmittelsammlung‹ in die Institution ein. Sie bestand zu großen Teilen aus Skeletten und Schädeln von Menschen, die sich der studierte Arzt auf zwei Forschungsreisen in Neu-Guinea und Australien (1904-1906) und dem südlichen Afrika (1907-1909) angeeignet hatte. Diese körperlichen Reste waren zentral für die Verankerung der Anthropologie als akademische Disziplin in Österreich. Pöch wurde 1913 zum außerordentlichen Professor und 1919 zum ersten ordentlichen Professor für Anthropologie und Ethnographie in Österreich ernannt. Seit Beginn seiner Lehre machte er regelmäßigen Gebrauch von der Sammlung (Weninger 1938: 196). Sie war zudem ein wichtiger Faktor dafür, dass er für die Gründung des schon lange angedachten Lehrstuhls ausgewählt wurde (Ranzmaier 2013: 199).

Die Sammlung besteht bis heute und diente Studierenden der Universität Wien bis 2016 als Untersuchungsmaterial. Vor Kurzem ist sie geschlossen worden. Andere als der Herkunft der Gebeine gewidmete Forschungen werden nun nicht mehr zugelassen, jeglicher Zugang bedarf der Erlaubnis der Beauftragten für Provenienzforschung (Matiasek 2017). Dieser Schritt folgte auf Bemühungen, »einen angemessenen, politisch korrekten Umgang mit solch heiklen Quellenmassen zu entwickeln« (Teschler-Nicola 2011: 52). Die Zweifel an den ethischen Grundlagen der Sammlungsnutzung waren vor allem von Forschungen zu Sammlungs- und Forschungsmethoden Pöch's ausgelöst worden. Die Entwicklungen sind jedoch in einem breiteren Kontext international geführter Auseinandersetzungen zu sehen. Seit den 1960er/70er Jahren fordern Indigene weltweit öffentlich die Rückgabe der körperlichen Überreste ihrer Ahnen aus akademischen und musealen Sammlungen (vgl. Fforde 2002). Im Kern der Verhandlungen liegen Fragen nach der (Un-)Rechtmäßigkeit der Aneignung der körperlichen Reste, dem Nutzen ihrer wissenschaftlichen Beforschung, der Entscheidungsgewalt über einen respektvollen Umgang mit den Verstorbenen und fortdauernde globale soziale, politische und ökonomische Ungleichheiten.

Diese Fragen und Verhandlungen sind durchzogen von den Nachwirkungen des Projekts, für das Pöch Leichen ausgraben ließ: die Klassifizierung von Menschen in ›Rassen‹, deren Abgrenzung untereinander anhand körperlicher Merkmale festgelegt

werden sollte. Dieser Aufgabe, und mit ihr der Festschreibung einer zweigeschlechtlichen Ordnung, typischen und abweichenden Körpern, widmete er sich als Professor und Forschungsreisender. In beiden Funktionen genoss er staatliche Unterstützung. Die Reisen dienten ihm als Möglichkeit ›Material‹ für Lehre und Forschung zu beschaffen. Sie fanden in Gebieten statt, die kolonial besetzt waren, und Pöch nutzte und reproduzierte diese kolonialen Strukturen, um den Widerstand der Menschen zu übergehen, die er beforschen und deren Körper er sich aneignen wollte.

Es ist diese Verbindung von Staat, Institution, Wissenschaft, Kolonialismus und Rassismus, welche die ›Pöch'sche Sammlung‹ ermöglicht hat. Forschungen zur Herkunft der Sammlung müssen notwendigerweise diese Verbindungen kritisch hinterfragen. Das bedeutet, die Provenienz der menschlichen Überreste über die Rekonstruktion ihrer konkreten, materiellen Aneignung hinauszudenken. Die Untersuchung der Verhältnisse zwischen Akteur\_innen, Institutionen und sich formierenden akademischen Disziplinen, innerhalb derer die rassialisierten Zugriffe auf Körper, kulturelle Produktionen und Lebensgrundlagen Kolonisierter und ihre Eingliederung in museale und akademische Sammlungen erfolgten, ist jüngst in Abgrenzung von eingeschränkteren Ansätzen als *postkoloniale* Provenienzforschung bezeichnet worden. Diese nimmt dezidiert »strukturelle Zusammenhänge zwischen dem kolonialen Projekt und der Erforschung einzelner ethnografischer Sammlungen und Museen« in den Blick und zielt damit »auf ein Verstehen der Sammlungs-, Institutions- und Fachgenese insgesamt« ab (Förster et al. 2018: 16f.).

Ich möchte diesen Impetus mit der Situierung von Forensik als politischer, gegenhegemonialer Praxis verbinden, wie sie die Forscher\_innen von *Forensic Architecture* vorschlagen. Diese denken sie als *Umkehrung* einer Forensik, die als Regierungsinstrument moderner Staaten eingesetzt wird, um abweichendes, ›kriminelles‹ Handeln aufzudecken bzw. zu verhindern. Frühe forensische und anthropologische Methoden verbindet eine Obsession mit der Festschreibung physischer, ›physiognomischer‹ Typen von Menschen. Körperliche Merkmale als Träger von Wahrheiten über menschliche Charakteristika wurden Teil moderner Regierungstechniken (vgl. Sekula 1986). Forensik als gegenhegemoniale Forschungsmethode zu verstehen, ermöglicht das Verhältnis zwischen Individuen und Staat zu invertieren, »to challenge and resist state and corporate violence and the tyranny of their truth« (Weizman 2014: 11). Eine Verbindung dieses Ansatzes mit postkolonialer Provenienzforschung erweitert das Untersuchungsfeld auf die Rolle anthropologischer und ethnographischer Forschungs- und Sammlungsgeschichte in der Formierung (kolonialer) Staaten und ihrer Herrschaftspraktiken. Inwiefern kann also eine Provenienzforschung, die auf ein Verstehen des Verhältnisses von Akteur\_innen, Institutionen und Staat in der Entstehungsgeschichte einer Sammlung aus kolonialen Kontexten abzielt, als Form gegenhegemonialer forensischer Forschung bezeichnet werden? Dies möchte ich im Folgenden anhand einer notwendigerweise fragmentarischen Untersuchung des Entstehungskontextes der Pöch-Sammlung zur Diskussion stellen.

Während Pöch seine erste größere anthropologische Forschungsreise nach Neu-Guinea und Australien selbst finanzierte, unternahm er die Reise ins südliche Afrika, »zum Zwecke des anthropologischen und ethnologischen Studiums der Buschmänner«,<sup>1</sup> mit

---

1 Archiv der Österreichischen Akademie der Wissenschaften (AÖAW), Subventionen, Karton 3, Zahl 862/1906, Brief Pöch an die Akademie der Wissenschaften, 25. Oktober 1906.

einer außergewöhnlich hohen Förderung der Kaiserlichen Akademie der Wissenschaften in Wien.<sup>2</sup> Die aus dieser Reise nach ›Deutsch Südwest-Afrika‹, ›Britisch Betschuanaland‹, ›Rhodesien‹, ›Portugiesisch-Ostafrika‹, dem Transvaal und der ›Kapkolonie‹ resultierenden Sammlungen stehen im Fokus dieses Textes.

## Die Konstruktion ›ursprünglicher‹ Körper

Es gibt wenige Hinweise in der Korrespondenz zwischen Pöch und der Akademie dazu, warum die indigene Bevölkerung des südlichen Afrika von ausreichender Bedeutung für die österreichische Wissenschaft war, um eine zweijährige Forschungsreise finanziell und infrastrukturell zu unterstützen. Der Beginn einer wissenschaftlichen Beschäftigung mit ›Buschmännern‹ in der Habsburgermonarchie wird von Brigitte Fuchs auf die Zeit nach der Novara-Weltumsegelung 1857-1859 datiert. Bereits 1857 wurden ein den so bezeichneten Menschen zugeschriebenes Skelett und ein Schädel an die Akademie der Wissenschaften in Wien geschickt und dort ausgestellt. Der Anatom Emil Zuckerkandl, einer von Pöchs Lehrern und Förderer seiner Reise ins südliche Afrika, untersuchte diese für eine spätere mehrbändige Publikation der Forschungsergebnisse der Novara (vgl. Zuckerkandl 1875; Fuchs 2012: 50-54). In verschiedenen, miteinander konkurrierenden evolutionistischen und anti-evolutionären Theorien, die im 19. und 20. Jahrhundert mithilfe rassialisierter Hierarchisierungen die Entwicklung der Menschheit darzustellen suchten, nahmen ›Buschmänner‹ eine wichtige Rolle ein. Als ältere Stufe der Evolution konstruiert, wurde ihnen ihre Zeitgenossenschaft abgesprochen. Statt gegen koloniale Gewalt vorzugehen und die Lebensbedingungen der Betroffenen zu verbessern, sah es die im Entstehen begriffene Anthropologie als ihre Aufgabe an, sich das Leben der Kolonisierten anzueignen, um es zu dokumentieren und zu klassifizieren. Evolutionistisch orientierte Anthropologie und Kolonisation teilten so die ideologische Prämisse und Konsequenz gleichermaßen, dass die indigene Bevölkerung des zu besetzenden/erforschenden Gebiets ›aussterben‹ würde (vgl. Wolfe 1999). ›Buschmänner‹ wurden in Pöchs Umfeld als ›lebende Fossilien‹ bezeichnet.<sup>3</sup> In den Siedlerkolonien des südlichen Afrikas funktionierte diese Rahmung zugleich als diskursives Mittel, um das Territorium als leer, unbevölkert darzustellen. Seine Bewohner\_innen wurden zu einem Teil der Landschaft erklärt (vgl. Witz et al. 2017).

In einem Gutachten in Zusammenhang mit der Reiseförderung hielt Carl Toldt (1840-1920), einer von Pöchs Mentoren und Professor für Anatomie an der Universität Wien, fest:

»Zufolge einer von dem Herrn Präsidenten der Akademie [Eduard Suess; Anmerkung d. Verf.] ausgegangenen Anregung haben wir uns seit etwa einem halben Jahr mit der Frage beschäftigt, ob es empfehlenswert sei, daß durch die Kaiserl. Akademie der Wissenschaften [...] eine anthropologisch-ethnographische Untersuchung der Buschmänner der Kalahari-Wüste veranlaßt werde. Der Umstand, daß die Buschmänner ein im Aussterben begriffenes Volk, eigentlich ein Überrest eines solchen sind, dessen

2 Im Folgenden kurz »Akademie« genannt.

3 AÖAW, Subventionen, Karton 3, Zahl 862/1906, Subventionsantrag Pöch an das Präsidium, 12. November 1906.

körperliche Eigenschaften, Sprache, Sitten und Lebensverhältnisse vieles Eigenartige und Hochinteressante bieten, aber bis jetzt nur sehr unvollkommen gekannt sind, ließ ein eingehendes Studium derselben von vorneherein als aussichtsvoll und höchst wünschenswert erscheinen.«<sup>4</sup>

Pöch schiffte Sammlungen nach Wien, die er als ethnologische, zoologische und botanische klassifizierte, nahm anthropometrische Vermessungen vor, führte sogenannte Lebendabgüsse an Menschen durch, also Gipsabdrücke von Händen, Füßen und Kopf, machte Ton-, Film- und Fotoaufnahmen, stellte geografische Beobachtungen an und versuchte sich in der Interpretation archäologischer Funde. Cornelia Essner hat in ihrer Kollektivbiographie deutscher Afrikareisender herausgearbeitet, dass Forschungsreisen in der Phase der Etablierung der Anthropologie eine »wohlüberlegte Entscheidung« darstellten, »von der sich die, die am Anfang der akademischen Laufbahn standen, eine Überwindung der allgemein unsicheren Zukunftsaussichten in dieser Laufbahn versprachen« (Essner 1985: 93). Für Pöch bedeutete die Entsendung als anthropologischer und ethnographischer Experte durch die Akademie einen wichtigen Schritt für seine weitere Karriere.

Brigitte Fuchs stellt diese Reise in den Kontext der Forschungen von Pater Wilhelm Schmidt (1868-1954) von der *Societas Verbi Divini* (SVD). Dieser suchte »eine ›katholische«, besonders gegen den ›Evolutionismus‹ gerichtete Version der Universalhistorie zu konstruieren« (Fuchs 2003: 208). Dafür entwarf er eine monotheistische, monogame ›Urrasse‹ als Ursprung der Menschheit und sah diese in Gesellschaften repräsentiert, die eine besonders geringe Körpergröße hatten. Um seine These zu stützen, verarbeitete er ethnologische Beobachtungen anderer Reisender und animierte Missionare der SVD zu Forschungsreisen. 1906 gründete er die Zeitschrift *Anthropos* mit Unterstützung der katholischen Kirche, katholischen Laienorganisationen und dem Deutschen Kolonialamt (vgl. Marchand 2003: 297). Schmidt entwickelte sich bald zu einer der einflussreichsten Personen der österreichischen Ethnologie.

1910, im Jahr nach seiner Rückkehr aus dem südlichen Afrika, erhielt Pöch seine *Venia legendi* mit dem Vortrag *Die Stellung der Buschmannrasse unter den übrigen Menschenrassen* (vgl. Lange 2013: 61f.). Er sah

»in der Buschmannrasse einen Zweig der Menschheit, der sich offenbar sehr früh von den gemeinsamen Urformen abgezweigt hat, der sich teils viele primitive Merkmale bewahrt hat und teils durch einseitige Spezialisierung und Anpassung verändert hat, so daß er jetzt als das Endglied einer besonderen Entwicklungsreihe dasteht, und wir unter den jetzt lebenden Menschenrassen vergeblich nach einer Form suchen, die wir ihr an die Seite stellen können« (Pöch 1911: 24).

Diese Schlussfolgerungen lassen sich mit Schmidts Theorien vereinbaren. Doch hielt es Pöch im selben Vortrag für wahrscheinlich, dass bei einem genaueren Vergleich der »kleingewachsenen Rassen [...] nur das eine gemeinsame Merkmal bleiben wird, nämlich die Kleinheit« (Pöch 1911: 24). In späteren Texten führte er diese Argumentation weiter

4 AÖAW, Subventionen, Karton 3, Zahl 862/1906, Gutachten Carl Toldt, 7. November 1906.



aus (vgl. Plankensteiner 2010: 104). Pöch zeigt sich also nicht als Anhänger der katholisch geprägten ›Urrassen‹-Theorie, auch wenn seine Arbeiten als Beiträge zu dieser Debatte zu sehen sind. Er war auf der Suche nach ›reinen Buschmännern‹, die er mittels linguistischer, ethnographischer und ›rassenmorphologischer‹ Untersuchungen so deutlich wie möglich von anderen Menschen abzugrenzen suchte.

Pöch sah ethnographische und anthropologische Arbeit als eng verbunden an, konzentrierte sich aber im Laufe seiner Karriere auf die physische Anthropologie und betonte die Bedeutung des Konzepts ›Rasse‹. Damit vollzieht er eine in der deutschsprachigen Anthropologie durchaus typische Entwicklung. Während sich Ethnographie und physische Anthropologie zunehmend voneinander abspalteten, organisierte sich die physische Anthropologie immer mehr um die Zentralität des Rassebegriffs. Dieser operierte durch Eugenik und Erblehre auch als Biologisierung sozialer Hierarchien innerhalb europäischer Staaten (vgl. Proctor 1988). Pöch und seine Frau Hella waren frühe Vertreter\_innen genetischer Ansätze in der anthropologischen Forschung in Österreich (vgl. Teschler-Nicola 2004). Angesichts der Schwierigkeiten, die gewünschten Ergebnisse empirisch nachzuweisen, argumentierte Pöch später mit einem Zirkelschluss:

»Die idealen Grundtypen haben sich also durch Beobachtung und Vergleich in unserem Gehirn gebildet, in der Wirklichkeit gibt es wohl nur sehr wenige Individuen, die ihnen vollständig entsprechen werden. Trotzdem sind diese Vorstellungen keine Phantasiegebilde, sondern können ganz wohl den raßlichen Grundelementen entsprechen, aus welchen sich ursprünglich die vorhandene Bevölkerung zusammengesetzt hat. So scheint es mir möglich, daß ein geschultes Auge aus systematischer Beobachtung und Untersuchung einer Menschheitsgruppe, einer ›Population‹, die Rasselemente, aus welcher sie zusammengesetzt ist, [...] herauschälen kann« (Pöch 1919: 203).

Sein Wunsch nach systematischer Untersuchung und Typenbildung erinnert sowohl an die Experimente Francis Galtons, der Photographien von Straffälligen übereinander belichtete, um die Essenz *des* generischen kriminellen Typus zu visualisieren, als auch an Alphonse Bertillons Bestreben, ein kriminalistisches Archiv zur Identifizierung individueller Verbrecher\_innen zu erstellen (vgl. Sekula 1986).<sup>5</sup>

Die Absicht, Typen zu erkennen und in verschiedene ›Rassen‹ zu klassifizieren, war auch die Grundlage für die von Pöch vorgenommenen Zuordnungen der von ihm beforschten Menschen im südlichen Afrika. Robert Gordon sieht in der Kategorie des *bushman* eine »Lumpenkategorie« des kolonialen südlichen Afrikas, die keine Entsprechung in ethnischen Zugehörigkeiten findet (Gordon 1992: 6f.). Auch Yvette Abrahams unterstreicht die Bedeutung einer Analyse des spezifischen ökonomischen Systems, in das die indigene Bevölkerung des Landes durch die Kolonialisierung integriert wurde (vgl. Abrahams 1994: 6). Neben dem wissenschaftlich und politisch gebräuchlicheren Khoisan, dessen erste Verwendung dem deutschen Wissenschaftler Leonhard Schultze,

---

5 In seiner eigenen photographischen Praxis folgte Pöch den von Bertillon entwickelten Anweisungen für erkennungsdienstliche Aufnahmen, fügte der Frontal- und Profilansicht jedoch noch ein Dreiviertelprofil hinzu (vgl. Lange 2013: 217-23).

einem Zeitgenossen Pöchs, zugeschrieben wird (vgl. Förster/Stoecker 2016: 80), wird heute auch die Selbstbezeichnung *bushman* ermächtigend verwendet. Der deutsche Begriff ›Buschmann‹ kann als fiktive Kategorie nicht losgelöst von seiner rassistischen Geschichte gesehen werden. Dennoch muss ich gerade deshalb zum Teil auf ihn zurückgreifen – es gibt keine ›echte‹, richtige Entsprechung.

## Wissenschaftliche Netzwerke, koloniale Herrschaft

Pöch war Teil eines international operierenden Netzwerkes aus Reisenden, Kolonialbeamten, der Polizei, Missionaren, Ärzten, Unternehmern und Wissenschaftlern zur Beschaffung anthropologischer Sammlungen. Das südliche Afrika war eine zentrale Region in diesem Handel. »The southern Kalahari and the northern Cape more generally were part of an enormous field site, stretching from southern Namibia across to then Bechuanaland, for the acquisition of human remains which were central to racial research in South Africa and Europe« (Legassick/Rassool 2000: 2).

Gefördert wurde diese Entwicklung durch ein Treffen der *British Association for the Advancement of Science* (BAAS) in Südafrika im Jahr 1905, das auf Einladung der zwei Jahre zuvor gegründeten *South African Association for the Advancement of Science* erfolgte. Der Vorsitzende der Anthropologischen Sektion bei dieser Konferenz war Alfred Haddon (1855-1940), Professor für Anthropologie in Cambridge. In seiner Rede rief er zur systematischen Erhebung anthropometrischer Daten in Südafrika auf und steigerte das Begehren in der südafrikanischen Wissenschaftslandschaft, sich die Körper der Kolonisierten als Sammlungsobjekte anzueignen (vgl. Legassick/Rassool 2000: 3).

Auf Wunsch der südafrikanischen Forscher wurden weitere internationale Wissenschaftler zur BAAS-Konferenz eingeladen, unter ihnen der Österreicher Felix von Luschan (1854-1924), seit 1904 Direktor der Afrika- und Neu-Guinea-Abteilungen des Königlichen Museums für Völkerkunde zu Berlin, bei dem Pöch 1900-1901 studiert hatte (vgl. Teschler-Nicola 2009: 67-73). Die Konferenz war von den englischen und südafrikanischen *Colonial Offices* großzügig gefördert worden (vgl. Morris 2002). Luschan nutzte den Aufenthalt für die eigene Arbeit und vermaß in Passausgabestellen und Gefängnissen ›Buschmänner‹. Solch zentrale Institutionen der Disziplinargesellschaft waren bevorzugte Orte der anthropologischen Forschung. Luschan arbeitete gemeinsam mit seiner Frau Emma, der Tochter Ferdinand von Hochstetters, einem Wegbereiter der anthropologischen Forschung in Österreich (vgl. Berner 2011: 190-9).

Auch Pöchs Forschungsreise genoss große Unterstützung. Wie schon für seine Reise nach Neu-Guinea stellte ihm das k.u.k. Außenministerium Empfehlungsschreiben für die jeweiligen Kolonialregierungen aus. Pöch organisierte zusätzliche Empfehlungen von ihm bekannten Kolonialbeamten. Diese verschafften ihm persönlichen Kontakt zu Bruno von Schuckmann, Gouverneur von ›Deutsch Südwest-Afrika‹, und Sir Walter Francis Hely Hutchinson, Gouverneur der ›Kapkolonie‹. Auch traf er andere Reisende, wie den bereits erwähnten, als Zoologen ausgebildeten Leonhard Schultze (1872-1955), um seine Routen und Forschungspläne mit deren Reiseerfahrungen abzustimmen. Schultze war mit Geldern der Alexander von Humboldt-Stiftung, der Wohlfahrtslotterie zu Zwecken der deutschen Schutzgebiete, der Kolonialabteilung des Auswärtigen Amtes und dem

Deutschen Seefischerei-Verband von 1903-1905 nach ›Deutsch Südwest-Afrika‹ gereist. Während des Vernichtungskrieges gegen Nama und Herero arbeitete er als Kriegsberichterstatter für Oberbefehlshaber und Gouverneur Lothar von Trotha (vgl. Förster/Stoecker 2016: 53-56). Es scheint naheliegend, dass dieser 1904 begonnene Krieg ein Faktor für den Entschluss der Akademie zur Förderung Pöchs zu dieser Zeit war. Kolonialbeamte und Wissenschaftler organisierten den Versand der körperlichen Reste von etlichen der Ermordeten für Sammlungen im Deutschen Kaiserreich (vgl. Shigwedha 2016). Unter den Opfern der Kämpfe und Übergriffe, die im Kontext dieses Genozids verübt wurden, waren auch Khoisan und weitere kolonialisierte Bewohner\_innen des südlichen Afrika. Die Lebensbedingungen der Überlebenden verschlechterten sich dramatisch (vgl. Gordon 1992: 54).

Angesichts der regen Beteiligung von eng mit der österreichischen Wissenschaftslandschaft verbundenen Forschern sowie des internationalen Austauschs in den sich etablierenden anthropologischen Disziplinen ist zudem davon auszugehen, dass die Entscheidung der Akademie auch von den Entwicklungen rund um die BAAS-Konferenz beeinflusst war.

Zur Zeit von Pöchs Aufenthalt in Südafrika hatte sich die Konkurrenzsituation auf dem Markt für *bushman relics* bereits so zugespitzt, dass Péringuey, der Direktor des Südafrikanischen Museums in Cape Town, sich veranlasst sah, Frank C. Shrubbsall, einem Kollegen in England, dem er regelmäßig Schädel zur Untersuchung schickte, zu berichten: »Dr Pöch of Vienna is now touring the country, and writes to me in order to pump me dry. Passarge and Schultz have finished their tour. It is really vexing that this work should not have been done here by local people«.<sup>6</sup>

## Methoden der Aneignung / Körper exportieren

Pöch äußert sich wenig dazu, wie er sich die körperlichen Reste Verstorbener verschaffte. Auch in der Beschreibung seiner Forschungsziele, die im Vorfeld der Reise allen Bitten um Empfehlungsschreiben und Unterstützung beigelegt wurde, erwähnt er die Aneignung menschlicher Überreste nicht. Anfang 1908 meldete er jedoch der Akademie: »Auf die Erwerbung von Schädeln und Skeletten, womöglich auch von Weichteilen [...] bin ich sehr bedacht, und hoffe mit der nötigen Vorsicht zu derartigem Material zu gelangen« (Pöch 1908a: 124). Die Kluft zwischen offiziellem Schweigen und der Arbeit, die für die Aneignungen notwendig war, deuten darauf hin, dass es sich um eine tabuisierte Praxis handelte. Wie Ciraj Rassool und Martin Legassick anhand der Korrespondenz von Louis Péringuey gezeigt haben, wurde dennoch offen über Beschaffungswege und Preise menschlicher Überreste verhandelt. Péringuey forderte Kolonialbeamte, Ärzte und Siedler\_innen dazu auf, ihm Schädel und Skelette zu besorgen, Grabstätten und potenzielle ›Forschungsobjekte‹ zu nennen (Rassool/Legassick 2000: 31-45). In einem von Pöch ausgelösten Briefwechsel zwischen einem Arzt und den Kolonialbehörden in Johannesburg wird eine Trennung zwischen offiziellem und informellem Umgang mit dem (auch per Tausch und Geschenk geführten) Handel explizit gemacht:

---

6 Archiv des Südafrikanischen Museums, Outgoing letter book, 243, Louis Péringuey to Shrubbsall, 30. April 1909.

»It is extremely difficult to deal officially with your letter [...] on the subject of the supply of native skulls to Dr Pöch of Vienna: the Colonial Secretary could not possibly sanction the handing over of native skulls for such a purpose but if you like to give him any skulls which may happen to be in your possession you could of course do so on your own responsibility«.<sup>7</sup>

Das einzige Mal, dass Pöch in seinen veröffentlichten Berichten die Aneignung körperlicher Reste erwähnt, geschieht dies mit einem signifikanten Zusatz: »Am 30. März ritt ich nochmals nach Zachas und exhumierte mit Farmer Balzar drei Buschmannskelette, zwei Männer und eine Frau. Die Exhumierung geschah mit Wissen und Zustimmung der Verwandten« (Pöch 1908b: 318). Die Zustimmung der Verwandten derjenigen, deren Überreste der anthropologischen Forschung übereignet werden sollten, wurde also offiziell durchaus als Notwendigkeit angesehen – und sei es bloß aus herrschaftspraktischen Erwägungen heraus. Dass Pöch sie wirklich einholte, ist zweifelhaft.

In jedem Fall handelte es sich hier um einen Kontext struktureller Gewaltverhältnisse. Farmer Balzar, mit dessen Hilfe Pöch die Ausgrabungen vornahm, beschäftigte viele *bushmen* auf seiner Farm Zachas im Gebiet Gobabis. Diese waren durch Landenteignungen und Jagdverbote zunehmend genötigt, sich als Arbeiter\_innen zu verdingen. Zudem zog die Polizei regelmäßig aus, um sie zwangsweise Farmen zuzuweisen. Die Kolonialbehörden sahen Zachas als positives Beispiel für die ›Zähmung‹ der Kolonisierten durch Arbeit (vgl. Gordon 1992: 54; 66). Verstorbene Arbeiter\_innen wurden oft auf den Farmen beerdigt, für die sie gearbeitet hatten; so konnten deren Besitzer\_innen über Zugriff auf die Gräber entscheiden.

In seinen veröffentlichten Berichten erwähnt Pöch nur diese eine Exhumierung. Im Archiv der Akademie lässt sich jedoch in unveröffentlichten Teilen seiner Berichte nachvollziehen, dass er Informationen zu angeeigneten menschlichen Überresten spätestens ab Juli 1909 mit dem Zusatz »vertraulich« versah.

Helga Pacher hat versucht, auf Grundlage von Pöchs Tagebüchern und zwei Inventaren am Anthropologischen Institut der Universität Wien, die Herkunft der osteologischen Sammlung aus dem südlichen Afrika zu ermitteln. In ihrer Publikation, die von einer zwischen 1921 und 1984 an der Akademie tätigen Kommission zur Verwaltung und Bearbeitung von Pöchs Nachlass herausgegeben wurde, stellte auch sie eine mangelhafte Dokumentation der Aneignungsumstände fest (vgl. Pacher 1962: 4). In einer Tabelle fasste sie alle Informationen zusammen, die sie finden konnte. Dort ist etwa die Rede von Knochen, die auf Pöchs Veranlassung von »Native-Commissioner Ellenberger exhumiert wurden« oder die er vom Sanitätskorporal in Tsau, Ngamiland, als Geschenk erhielt (ebd.: 5). Weitere Skelette und Schädel erhielt er mit Hilfe der Polizei, von Missionaren, Ärzten, Händlern und Assistenten. Die Aufgabe letzterer bestand darin, Grabstätten ausfindig zu machen. Je nachdem, was die Situation erlaubte, gruben sie diese heimlich oder mit Erlaubnis derjenigen aus, auf deren Gebiet die Gräber lagen und entfernten gegebenenfalls verwesende Körperreste von den Knochen.

---

7 National Archives of South Africa, CS 879 15788, H.R.M. Bourne, Colonial Secretary Pretoria, to Dr. Gilchrist, Chief District Surgeon Johannesburg, 25. Juni 1909.

In ihrer Studie *Skeletons in the Cupboard* haben Legassick und Rassool aufgezeigt, dass es zur Zeit von Pöchs Reise unterschiedliche Regulierungen in Bezug auf die Exhumierung Indigener im Gebiet des heutigen Südafrika gab. Verhandlungen über die (Il-)Legalität dieser Praxis lassen sich in den kolonialen Archiven nachvollziehen. Besonders aufschlussreich ist die Korrespondenz, die in Zusammenhang mit einer Polizeiinvestigation gegen Pöch und einen seiner Assistenten, Mehnarto, geführt wurde. Mehnarto hatte in einem Fall die örtlichen Behörden um Erlaubnis für die Exhumierung von zwei Leichen gefragt. Diese wurde ihm jedoch verweigert: Man hielt dies den Verstorbenen gegenüber für ungerecht. Außerdem sollten die Körper, wenn sie tatsächlich von wissenschaftlichem Wert wären, ans Südafrikanische Museum gehen um in der Kolonie zu bleiben. Mehnartos Helfer gaben Zeugenaussagen ab, aus denen sein Vorgehen detailliert nachvollziehbar wird (vgl. Legassick/Rassool 2000: 15; 21-24). Belegt wird dort auch, dass Mehnarto gegen den Willen von Angehörigen Verstorbener handelte. Die Witwe eines weiteren Exhumierten erklärte:

»No one asked my permission to take my relatives' bodies. After I had heard that the white men had taken my relatives' bodies and cooked the flesh off their bones, I prepared to leave for the Langberg to report the matter to the Police, but I was told that Bushmen were outside the Law, and that I would get no hearing. People at Kuie told me this, I thought they were right and kept quiet. Since I heard that my relatives' bodies were taken and cooked I am sick from sorrow and I will not recover from the shock for a long time. I wept for days.«<sup>8</sup>

Trotz der eindeutigen Beweislage war unklar, nach welchem Gesetz Anklage gegen Mehnarto und Pöch erhoben werden könnte. Die Behörden schlugen vor, mit einem Gesetz zu arbeiten, das den Staat dazu verpflichtete, allen Verstorbenen ein würdevolles Begräbnis zu gestatten. Pöchs Empfehlungen von höchsten Stellen und sein Ruf als Wissenschaftler ließen sie jedoch von einem Prozess absehen (vgl. Legassick/Rassool 2000: 27-9).

## » Unrechtskontext «

Der Deutsche Museumsbund weist in seinen *Empfehlungen zum Umgang mit menschlichen Überresten in Museen und Sammlungen* darauf hin, dass eine »wesentliche Frage beim Umgang mit menschlichen Überresten ist, wie die Umstände des Todes, des Erwerbs und bei [...] (Ritual-)Gegenständen auch der Entstehung jeweils rechtlich und insbesondere auch ethisch zu bewerten sind« (DMB 2013: 9). Die Richtlinien haben den Begriff des *Unrechtskontextes* für solche Umstände eingeführt, in denen der Person, von der die Überreste stammen, Unrecht angetan wurde. Dabei handelt es sich ausdrücklich nicht um einen rechtlichen oder universal definierbaren ethischen Begriff. Mithilfe von

---

<sup>8</sup> Western Cape Archives and Records Service, JUS 62 20223/09/09, Old Katje: Statement made to Lance Corporal Ross through an interpreter at Kuiepan, 26. Januar 1910; vgl. auch Legassick/Rassool 2000:15.

Fallbeispielen versuchen die Autor\_innen Anhaltspunkte für eindeutige Situationen zu liefern. Diese zielen auf *individuelles* Unrecht ab, wenn also der betroffenen Person Gewalt angetan oder die Überreste gegen den Willen von »Verfügungsberechtigten« angeeignet wurden (DMB 2013: 10).

Im Fall der zwei von Mehnarto exhumierten Leichen konnte nachgewiesen werden, dass gegen den Willen von Behörden *und* »Verfügungsberechtigten« gehandelt worden war. Die in den kolonialen Archiven als Ehepaar Klaas und Trooi Pienaar Identifizierten wurden 2012 nach Südafrika zurückgeführt und im Rahmen einer Staatszeremonie in Kuruman, der ihren ersten Gräbern nächstgelegenen Stadt im Northern Cape, wiederbeerdigt (vgl. Sauer 2012; Rassool 2015a; Weiss-Krejci 2013). Statt auf forensische Methoden im Sinne einer anthropologisch-humanbiologischen Untersuchung der körperlichen Reste wurde bei den Recherchen zur Identifizierung von Nachfahren auf mündliche und schriftliche Archive gesetzt. Tatsächlich konnten bei Befragungen von Khoisan-Communities im Northern Cape familiäre Verbindungen zu den Pienars festgestellt werden. Nicht die biologische Genealogie wurde hier also in den Vordergrund gestellt, vielmehr kam ein offeneres Konzept kultureller, sozio-politischer Nachkommenschaft zum Tragen (vgl. Rassool 2015a: 667f.). Verfahren der als *disciplines of the dead* bezeichneten Anthropologie, Humanbiologie und Archäologie wurden in diesem Fall aufgrund ihrer historischen Verstrickungen mit Kolonialismus und Rassismus programmatisch abgelehnt (vgl. Rassool 2015b).

Ein Verständnis von Forensik als explizit politischer, gegenhegemonialer Praxis unterstreicht dagegen eben jenen Fokus auf die Untersuchung des Verhältnisses zwischen Individuen, Disziplinen, Staat, Kolonialismus und Rassismus in der Entstehungsgeschichte solcher Sammlungen. Damit wird auch die Definition eines »Unrechtskontextes« erweitert. *Strukturelle* Unrechtskontexte müssen im Zentrum der kritischen Befragung von Sammlungsprovenienzen stehen, wie auch Bénédicte Savoy und Felwine Sarr in ihrem Bericht zur Restitution afrikanischen Kulturerbes deutlich machen (vgl. Savoy/Sarr 2018). Wandile Kasibe spricht hier von *colonial crime scenes* (vgl. Kasibe 2018).<sup>9</sup> *Postkoloniale* Provenienzforschung – oben anhand der »Pöch-Sammlung« skizziert – kann in diesem Sinne auch als kriminologische Investigation kolonialer Verbrechen und der Rolle anthropologischer und ethnographischer Sammlungspraxis in ihnen gelesen werden.

Doch nicht nur die Art und Weise der Aneignung und Eingliederung von menschlichen Überresten und Artefakten in anthropologische und ethnographische Sammlungen sollte Teil solch einer forensischen Untersuchung sein. Auch die weitere Nutzung, die an ihnen vorgenommenen Forschungen und die Funktion der Sammlungen für die Aufrechterhaltung disziplinärer Autorität und staatlicher Regierungsformen muss analysiert werden. Welche Bedeutung hat der Entstehungskontext einer akademischen osteologischen

---

9 Am 29. September 2018 hat ein Workshop mit dem Titel *Towards the Museum Truth, Repatriation and Reparations Commission* im Südafrikanischen Museum in Cape Town stattgefunden, den Wandile Kasibe initiiert hat. Ziel war es, eine offizielle Kommission ins Leben zu rufen, die das durch museale und akademische Sammlungen menschlicher Überreste begangene Unrecht in Südafrika untersucht. Das Potenzial solch einer Kommission war in den letzten Jahren von verschiedenen im Feld tätigen Personen andiskutiert worden.

Sammlung für die Wahrheiten, für das Wissen, das mit ihrer Hilfe produziert wurde? Was bedeutet es etwa, dass Studierende des Anthropologischen Instituts der Universität Wien in Forschungen an den menschlichen Überresten der ›Pöchschen Sammlung‹ bis ins Jahr 2016 Pöchs Klassifizierungen unhinterfragt übernommen haben, um Vergleiche verschiedener ›Populationen‹ anzustellen (vgl. Cermak 2012; März 2016)? Welche Rolle nimmt der weitere Verbleib der von Rudolf Pöch vor mehr als einhundert Jahren angeeigneten körperlichen Reste Verstorbener aus dem südlichen Afrika in einer Sammlung der Universität Wien für das aktuelle Verhältnis von Institution, Staat, Post-Kolonialismus und Rassismus in Österreich ein?

Dieser Beitrag hat ein *peer-review*-Verfahren mit *double blind*-Standard durchlaufen.

## Literatur

- ABRAHAMS, Yvette (1994): *Resistance, Pacification and Consciousness. A Discussion of the Historiography of Khoisan Resistance from 1972 to 1993 and Khoisan Resistance from 1652 to 1853*, MA, University of Cape Town.
- BERNER, Margit (2011): »Zwei Spurensuchen. Objekte, Archive, Geschichte«. In: *Sensible Sammlungen. Aus dem anthropologischen Depot*, hg. v. M. Berner et al. Hamburg: Philo Fine Arts, 185–203.
- CERMAK, Caroline (2012): »Der *Calcaneus* in Raum und Zeit unter besonderer Berücksichtigung des plantaren Fersensporns – Ein Vergleich von rezenten und historischen Populationen«, MA, Universität Wien.
- DEUTSCHER MUSEUMSBUND E.V. (2013): »Empfehlungen zum Umgang mit menschlichen Überresten in Museen und Sammlungen«, [http://www.museumsbund.de/fileadmin/geschaefts/dokumente/Leitfaeden\\_und\\_anderes/2013\\_Empfehlungen\\_zum\\_Umgang\\_mit\\_menschl\\_UEberresten.pdf](http://www.museumsbund.de/fileadmin/geschaefts/dokumente/Leitfaeden_und_anderes/2013_Empfehlungen_zum_Umgang_mit_menschl_UEberresten.pdf) (22.01.2015).
- ESSNER, Cornelia (1985): *Deutsche Afrikareisende im neunzehnten Jahrhundert: zur Sozialgeschichte des Reisens*. Stuttgart: Steiner.
- FFORDE, Cressida et al. (Hg.) (2002): *The Dead and their Possessions. Repatriation in Principle, Policy and Practice*, Routledge: London.
- FÖRSTER, Larissa/STOECKER, Holger (2016): *Haut, Haar und Knochen. Koloniale Spuren in naturkundlichen Sammlungen der Universität Jena*, Weimar: VDG.
- FÖRSTER, Larissa et al. (2018): »Eine Tagung zu postkolonialer Provenienzforschung – Zur Einführung«. In: *Provenienzforschung zu ethnografischen Sammlungen der Kolonialzeit*, hg. v. L. Förster et al., Berlin: Humboldt Universität.
- FUCHS, Brigitte (2003): ›Rasse‹, ›Volk‹, ›Geschlecht. *Anthropologische Diskurse in Österreich 1850-1960*, Wien: Campus.
- FUCHS, Brigitte (2012): »Bushmen in Hick Town. *The Austrian Empire and the Study of the Khoesan*«. In: *Austrian Studies* 20, 43-59.
- GORDON, Robert (1992): *The bushman myth: the making of a Namibian underclass*. Colorado u.a.: Westview Press.
- KASIBE, Wandile (2018): »Repatriate remains to restore dignity«, <https://www.news24.com/Columnists/GuestColumn/repatriate-remains-to-restore-dignity-20180916-2> (30.09.18).

- LANGE, Britta (2013): *Die Wiener Forschungen an Kriegsgefangenen 1915 – 1918. Anthropologische und ethnografische Verfahren im Lager*, Wien: Verlag der Österreichischen Akademie der Wissenschaften.
- LEGASSICK, Martin/RASSOOL, Ciraj (2000): *Skeletons in the Cupboard. South African museums and the trade in human remains 1907-1917*, Cape Town: SAM and Kimberley: McGregor Museum.
- VON LUSCHAN, Felix (1906): »Anthropologie, Ethnographie und Urgeschichte«. In: *Anleitung zu wissenschaftlichen Beobachtungen auf Reisen*, Band 2, hg. v. G. Neumayer, Hannover: Max Jänecke, 1-153.
- MARCHAND, Suzanne (2003): »Priests among the Pygmies. Wilhelm Schmidt and the Counter-Reformation in Austrian Ethnology«. In: *Worldly Provincialism. German Anthropology in the Age of Empire*, hg. v. H. Glenn Penny/M. Bunzl, Ann Arbor: University of Michigan Press, 283-316.
- MATIASEK, Katarina (2017): *Pöch Sammlung*. Antwort per Email auf eine Anfrage der Autorin. Gesendet am 06.04.2017. Nachricht im Archiv der Autorin.
- MÄRZ, Julia (2016): »Association of Pelvic Shape, Body Height, and Head Circumference in Khoisans«, MA, Universität Wien.
- MORRIS, Alan (2002): »The British Association Meeting of 1905 and the Rise of Physical Anthropology in South Africa«. In: *South African Journal of Science* 98, 336-340.
- PACHER, Helga-Maria (1962): *Anthropologische Untersuchungen an den Skeletten der Rudolf Pöchschen Buschmannsammlung*. Österreichische Akademie der Wissenschaften. Rudolf Pöch-Nachlass, Serie A: Physische Anthropologie, Wien u.a.: Böhlau.
- PLANKENSTEINER, Barbara (2009): »Auch hier gilt unsere Regel, Buschmanngut und Fremdgut auseinanderzuhalten«. Rudolf Pöchs Südafrika-Sammlung und ihre wissenschaftliche Bearbeitung durch Walter Hirschberg«. In: *Archiv für Völkerkunde* 59/60, 95-106.
- PÖCH, Rudolf (1908a): »Bericht aus Oas (Kameelfontain), 3. Februar 1908«. In: *Sitzungsberichte der kaiserl. Akad. D. Wiss. Wien, math.-naturw. Klasse, Akademischer Anzeiger*: 9. Wien: K. K. Hof- und Staatsdruckerei, 123-125.
- PÖCH, Rudolf (1908b): »Bericht aus Oas (Kameelfontain), 15. April 1908«. In: *Sitzungsberichte der kaiserl. Akad. D. Wiss. Wien, math.-naturw. Klasse, Akademischer Anzeiger*: 16. Wien: K. K. Hof- und Staatsdruckerei, 316-320.
- PÖCH, Rudolf (1911): »Die Stellung der Buschmannrasse unter den übrigen Menschenrassen«. In: *Korrespondenz-Blatt der Deutschen Gesellschaft für Anthropologie, Ethnologie und Urgeschichte* 42, 21-26.
- PÖCH, Rudolf (1919): »Neue anthropologische Fragestellungen«. In: *Mitteilungen der k.k. Geographischen Gesellschaft in Wien* 62, 193-210.
- PROCTOR, Robert (1988): »From Anthropology to Rassenkunde in German Anthropological Tradition«. In: *Bones, Bodies, Behaviour. Essays On Biological Anthropology*, hg. v. G. Stocking, London: University of Wisconsin Press, 138-179.
- RASSOOL, Ciraj (2015a): »Re-storing the Skeletons of Empire. Return, Reburial and Rehumanisation in Southern Africa«. In: *Journal of Southern African Studies* 41:3, 653-670.
- RASSOOL, Ciraj (2015b): »Human Remains: Disciplines of the Dead and the South African Memorial Complex«. In: *The Politics of Heritage in Africa: Economies, Histories, Infrastructures*, hg. v. D.R. Petersen et al., Cambridge: Cambridge University Press, 133-156.
- SAUER, Walter (2012): »Die Geschichte von Klaas und Trooi Pienaar«. In: *INDABA* 74, 3-8.



- SAVOY, Bénédicte/SARR, Felwine (2018): »The Restitution of African Cultural Heritage. Toward a New Relational Ethics«, <http://restitutionreport2018.com> (17.12.2018).
- SEKULA, Alan (1986): »The Body and the Archive«. In: *October* 39, 3-64.
- SHIGWEDHA, Vilho (2016): »The Return of Herero and Nama Bones from Germany. The Victims' Struggle for Recognition and Recurring Genocide Memories in Namibia«. In: *Human Remains in Society. Curation and Exhibition in the Aftermath of Genocide and Mass-violence*, hg. v. É. Anstett/ J.-M. Dreyfus, Manchester: Manchester University Press, 197-219.
- TESCHLER-NICOLA, Maria (2004): »The Diagnostic Eye – On the History of Genetic and Racial Assessment in Pre-1938 Austria«. In: *Collegium antropologicum* 28:2, 7-29.
- TESCHLER-NICOLA, Maria (2009): »Felix von Luschan und die Wiener Anthropologische Gesellschaft«. In: *Felix von Luschan (1854-1924). Leben und Wirken eines Universalgelehrten*, hg. v. P. Ruggendorfer/H. Szemethy, Wien u.a.: Böhlau, 55-79.
- TESCHLER-NICOLA, Maria (2011): »Rudolf Pöchs osteologische Lehr- und Forschungssammlung im Spannungsfeld von Wissenschaft und Ethik«. In: *Mitteilungen der Anthropologischen Gesellschaft Wien* 1414, 51-66.
- WEISS-KREJCI, Estella (2013): »Abschied aus dem Knochenkabinett – Repatriierung als Instrument kultureller und nationaler Identitätspolitik am Beispiel österreichischer Restitutionsen«. In: *Sammeln, Erforschen, Zurückgeben? Menschliche Gebeine aus der Kolonialzeit in akademischen und musealen Sammlungen*, hg. v. H. Stoecker et al., Berlin: Ch. Links Verlag, 447-476.
- WEIZMAN, Eyal (2014): »Introduction«. In: *Forensis. The Architecture of Public Truth*, hg.v. Forensic Architecture, Berlin: Sternberg Press, 9-32.
- WENINGER, Josef (1938): »25 Jahre Anthropologisches Institut an der Universität in Wien«. In: *Mitteilungen der Anthropologischen Gesellschaft Wien* 68, 191-205.
- WITZ, Leslie et al. (2017): »Heritage and the Post Anti-Apartheid«. In: *Unsettled History. Making South African Pasts*, hg. v. L. Witz et al., Ann Arbor: University of Michigan Press, 218-245.
- WOLFE, Patrick (1999): *Settler Colonialism and the Transformation of Anthropology*, London: Cassel.
- ZUCKERKANDL, Emil (1875): »Cranien der Novara-Sammlung«. In: *Reise der österreichischen Fregatte Novara um die Erde*, Wien: Gerald.

## Archive

ARCHIV DER ÖSTERREICHISCHEN AKADEMIE DER WISSENSCHAFTEN IN WIEN

Allgemeine Akten

Subventionen

ARCHIV DES SÜDAFRIKANISCHEN MUSEUMS IN CAPE TOWN

Outgoing Letter Books

NATIONAL ARCHIVES OF SOUTH AFRICA IN PRETORIA

Transvaal, Colonial Secretary

WESTERN CAPE ARCHIVES AND RECORDS SERVICE IN CAPE TOWN

Cape Colony, Department of Justice
